# Supplementary material for: Activation maps of convolutional neural networks as a tool for brain degeneration tracking in early diagnosis of dementia in Parkinson's disease based on magnetic resonance imaging
Source: Research Square preprint supplement (doi:10.21203/rs.3.rs-362850/v2), 2022-08-09
Supplement: Supplementary file 1 [file 6889047c216817cfbc434875.docx]

**Supplementary File 2.** Group-specific mean value and standard deviation for cerebellum volume and folding together with the results of statistical testing and effect size analysis.

|  | **All patients (N=18)** | | **Age-matched patients (N=9)** | |
| --- | --- | --- | --- | --- |
| Cerebellum volume | Cerebellum folding | Cerebellum volume | Cerebellum folding |
| PD-CN | 11.13 ± 1.18 | 0.22 ± 0.02 | 12.49 ± 0.59 | 0.24 ± 0.02 |
| PD-MCI | 10.17 ± 0.97 | 0.20 ± 0.02 | 10.01 ± 1.08 | 0.20 ± 0.01 |
| PDD | 8.61 ± 0.70 | 0.18 ± 0.01 | 8.29 ± 0.26 | 0.17 ± 0.02 |
| ANOVA p-value | 0.003834 | 0.003054 | 0.0012 | 0.0018 |
| Effect size – parametric η2 | 0.5254 | 0.5357 | 0.8941 | 0.8777 |
| Kruskal-Wallis ANOVA p-value | 0.0176 | 0.0057 | 0.0273 | 0.0273 |
| Effect size – nonparametric η2 | 0.4133 | 0.5513 | 0.9000 | 0.9000 |
