# Supplementary material for: Activation maps of convolutional neural networks as a tool for brain degeneration tracking in early diagnosis of dementia in Parkinson's disease based on magnetic resonance imaging
Source: Research Square preprint supplement (doi:10.21203/rs.3.rs-362850/v2), 2022-08-09
Supplement: Supplementary file 2 [file d687e68122f3cb5d763a0348.docx]

**Supplementary File 1.** Demographic and clinical data of the studied group (given as mean value ± standard deviation).

| Parameter | PD  (all patients) | PD-CN  (cognitively normal) | PD-MCI  (mild cognitive impairment) | PDD  (with dementia) | Unadjusted ANOVA  P-value | BH FDR- adjusted ANOVA P-value |
| --- | --- | --- | --- | --- | --- | --- |
| No | 18 | 10 | 4 | 4 |  |  |
| F / M | 3 / 15 | 3 / 7 | 0 / 4 | 0 / 4 |  |  |
| Age at onset | 57.50 ± 9.13 | 55.20 ± 7.10 | 53.00 ± 8.29 | 67.75 ± 8.22 | 0.024183A | 0.043721 |
| Age at examination | 66.22 ± 8.50 | 63.60 ± 5.21 | 61.50 ± 8.81 | 77.50 ± 5.26 | 0.002800A | 0.016853 |
| Disease duration | 8.78 ± 4.71 | 8.50 ± 4.12 | 8.50 ± 5.20 | 9.75 ± 6.80 | 0.907278A | 0.907278 |
| Hoehn-Yahr stage | 2.44 ± 0.62 | 2.20 ± 0.42 | 2.50 ± 1.00 | 3.0 ± 0.0 | 0.044403B | 0.062904 |
| UPDRS III ON | 17.00± 10.14 | 12.50 ± 8.37 | 21.00 ± 12.27 | 24.25 ± 7.95 | 0.091764A | 0.119999 |
| UPDRS III OFF | 35.67±14.51 | 29.80 ± 11.9 | 45.00 ± 18.60 | 41.0 ± 12.38 | 0.147291A | 0.178853 |
| Dominant side (R/L) | 12 / 6 | 8 / 2 | 3/ 1 | 1 / 3 | 0.177117C | 0.200733 |
| LEDD | 806.4±372.6 | 698.5±309.3 | 1235.0±264.4 | 647.5 ± 335.2 | 0.020762A | 0.043721 |
| MMSE | 26.28 ± 3.89 | 28.20 ± 1.14 | 26.75 ± 1.50 | 21.00 ± 5.48 | 0.042451B | 0.062904 |
| CDT | 7.72 ± 3.08 | 9.80 ± 0.63 | 7.00 ± 2.94 | 3.25 ± 1.50 | 0.001709B | 0.016852 |
| BDI | 9.78 ± 5.85 | 9.70 ± 5.93 | 12.75 ± 6.65 | 7.00 ± 4.69 | 0.403331A | 0.428539 |
| AVLT delayed recall | 5.22 ± 3.81 | 7.40 ± 3.37 | 3.75 ± 2.63 | 1.25 ± 1.26 | 0.007159A | 0.020284 |
| BVRT mistakes | 5.22 ± 2.92 | 4.20 ± 2.04 | 4.25 ± 2.50 | 8.75 ± 2.87 | 0.025718B | 0.043721 |
| Verbal fluency | 11.78 ± 2.94 | 13.60 ± 1.65 | 11.00 ± 2.00 | 8.00 ± 2.45 | 0.002974B | 0.016853 |
| Semantic fluency | 14.89 ± 3.79 | 17.20 ± 2.30 | 14.25 ± 2.99 | 9.75 ± 1.71 | 0.006779B | 0.020284 |
| Digit span forward | 5.67 ± 1.14 | 6.00 ± 1.05 | 6.25 ± 0.50 | 4.25 ± 0.50 | 0.025080B | 0.043721 |
| Digit span backward | 4.11 ± 1.41 | 4.90 ± 0.88 | 4.25 ± 0.96 | 2.00 ± 0.00 | 0.006734B | 0.020284 |

F = female, M = male, UPDRS = Unified Parkinson's disease rating scale, LEDD = levodopa equivalent daily dose, MMSE = Mini-Mental State Examination, CDT = Clock Drawing Test, BDI = Beck Depression Inventory, AVLT = Auditory Verbal Learning Test, BVRT = Benton Visual Recognition Test, BH FDR-adjusted = Benjamini-Hochberg False Discovery Rate adjusted A parametric ANOVA, B Kruskal-Wallis ANOVA, C Fisher exact test.
